# Supplementary material
Source: ML conference proceedings conference paper supplement (https://openreview.net/forum?id=gsq56M_Pcts)
Supplement: supplementary_material [file attachment]

## A ViT PATH SIZE STUDY

| Patch size | Score             | Mean Time |
|------------|-------------------|-----------|
| 6          | 305.7 $\pm$ 71.0  | 4:56.33   |
| 8          | 801.9 $\pm$ 523.9 | 3:22.4    |
| 10         | 778.0 $\pm$ 324.0 | 3:10.2    |
| 12         | 627.0 $\pm$ 284.0 | 3:12.8    |

Table 1: Scores obtained by training Rainbow, using different path sizes for ViT, in MsPacman for 100k steps across 10 different seeds

## B TOV-VICREG PSEUDOCODE

```
# N: batch size, D: dimension of the embedding
# mse_loss: Mean square error loss function, off_diagonal: off-
# diagonal elements of a matrix, relu: ReLU activation function
# shuffle: shuffles elements in a certain dimension according to a
# permutation index
for u, v, w in loader: # load a batch with N samples
    # u -> x_{t}
    # v -> x_{t-1}
    # w -> x_{t+1}

    # apply augmentations
    u_a = augmentation_1(u)
    u_b = augmentation_2(u)
    v = augmentation_3(v)
    w = augmentation_3(w)

    # compute representations
    y_u_a = encoder(u_a)
    y_u_b = encoder(u_b)
    y_v = encoder(v)
    y_w = encoder(w)

    # compute embeddings
    z_u_a = expander(y_u_a)
    z_u_b = expander(y_u_b)
    z_v = expander(y_v)
    z_w = expander(y_w)

    shuffle_indexes = randint(0, 6) # sample from 0 to 3 permutations
    of 3
    labels = where(shuffle_indexes == 0, 0, 1)

    # concat and shuffle (N, 3, D)
    c = concat(p_u_a, p_v, p_w)
    c = shuffle(c, shuffle_indexes, dim=1)

    # temporal loss
    preds = linear(c) # Linear layer Dx6
    temp_loss = Binary_Cross_Entropy_Loss(preds, labels)

    # invariance loss
    sim_loss = mse_loss(z_a, z_b)

    # variance loss
    std_z_a = torch.sqrt(z_a.var(dim=0) + 1e-04)
    std_z_b = torch.sqrt(z_b.var(dim=0) + 1e-04)
    std_loss = torch.mean(relu(1 - std_z_a)) + torch.mean(relu(1 -
std_z_b))
```

---

```

# covariance loss
z_a = z_a - z_a.mean(dim=0)
z_b = z_b - z_b.mean(dim=0)
cov_z_a = (z_a.T @ z_a) / (N - 1)
cov_z_b = (z_b.T @ z_b) / (N - 1)
cov_loss = off_diagonal(cov_z_a).pow_(2).sum() / D + \
           off_diagonal(cov_z_b).pow_(2).sum() / D

# loss
loss = inv_coef * inv_loss + var_coef * var_loss + cov_coef *
cov_loss + temp_coef * temp_loss

# optimization step
loss.backward()
optimizer.step()

```

Listing 1: Pytorch-like TOV-VICReg pseudocode

## C TOV-VICREG AUGMENTATIONS

```

# Augmentation 1 / tau
RandomResizedCrop(84, scale=(0.08, 1.)),
RandomApply([
    ColorJitter(0.4, 0.4, 0.2, 0.1)
], p=0.8),
RandomGrayscale(p=0.2),
RandomApply([GaussianBlur((7, 7), sigma=(.1, .2))], p=1.0),
RandomHorizontalFlip()

# Augmentation 2 / tau prime
RandomResizedCrop(84, scale=(0.08, 1.)),
RandomApply([
    ColorJitter(0.4, 0.4, 0.2, 0.1)
], p=0.8),
RandomGrayscale(p=0.2),
RandomApply([GaussianBlur((7, 7), sigma=(.1, .2))], p=0.1),
RandomSolarize(120, p=0.2),
RandomHorizontalFlip(),

# Augmentation 3 / tau two prime and tau three prime
RandomApply([
    ColorJitter(0.4, 0.4, 0.2, 0.1)
], p=0.8),
RandomGrayscale(p=0.2),

```

Listing 2: Pytorch-like pseudocode of TOV-VICReg augmentations

## D RAINBOW IMPLEMENTATION

We trained our agents using a PyTorch implementation of the Rainbow algorithm available on GitHub, which offers enough flexibility to adapt it to our needs. In Table 2 we present a comparison between the implementation used and the official results reported by DER (van Hasselt et al., 2019), we observed a similar performance in most games except for Assault, and Frostbite, where the official results are significantly higher. Despite these differences, we validated the implementation code and are confident that the results here presented are trustworthy. To allow the agents to play the Atari games we used the gym library (Brockman et al., 2016), where for all games we used version number four of the environments (v4), disabled the default frame skip, and wrapped it with the DQN wrappers.

| Game            | DER    | DER (ours)        |
|-----------------|--------|-------------------|
| Alien           | 739.9  | 446.6 $\pm$ 224.7 |
| Assault         | 431.2  | 178.7 $\pm$ 87.1  |
| Bank Heist      | 51.0   | 23.8 $\pm$ 14.3   |
| Breakout        | 1.9    | 1.93 $\pm$ 1.43   |
| Chopper Command | 861.8  | 696.0 $\pm$ 274.6 |
| Freeway         | 27.9   | 27.8 $\pm$ 2.0    |
| Frostbite       | 866.8  | 127.7 $\pm$ 25.8  |
| Kangaroo        | 779.3  | 448.0 $\pm$ 648.0 |
| MsPacman        | 1204.1 | 1015 $\pm$ 487.1  |
| Pong            | -19.3  | -18.6 $\pm$ 4.4   |

Table 2: Comparison between DER scores and our implementation scores

## E ATARI ENVIRONMENTS SETUP

We used the Atari games available at the gym library (Brockman et al., 2016) (version 0.23.1), and all games were run using their 4th version without frame skip, e.g. "AlienNoFrameskip-v4". Furthermore, we employ similar wrappers to the environments as previous works (Mnih et al., 2015), namely, scale observation to 84x84, change observations to grayscale, stack observations, apply a max number of no-op actions, and terminate the environment when the agent loses a life.

```
env = AtariPreprocessing(env, terminal_on_life_loss=True,
scale_obs=True)
env = TransformReward(env, np.sign)
env = FrameStack(env, 3)
```

Listing 3: Gym Atari Wrappers

## F SELF-SUPERVISED METHODS HYPERPARAMETERS

| Hyperparameter                          | Value                |
|-----------------------------------------|----------------------|
| Drop path rate                          | 0.1                  |
| Freeze last layer                       | True                 |
| # local crops                           | 8                    |
| Local crops scale interval              | [0.05, 0.5]          |
| Learning rate                           | $5.0 \times 10^{-4}$ |
| Min learning rate                       | $1.0 \times 10^{-6}$ |
| Teacher ema coefficient                 | 0.996                |
| Normalize last layer                    | False                |
| Optimizer                               | AdamW                |
| Out dimension                           | 1024                 |
| Use batch normalization in head         | false                |
| Teacher warmup temperature              | 0.04                 |
| # warmup epochs for teacher temperature | 0                    |
| Weight decay                            | 0.04                 |
| Weight decay final value                | 0.4                  |

Table 3: DINO hyperparameters

---

| Hyperparameter                   | Value                |
|----------------------------------|----------------------|
| Random crop min scale            | 0.08                 |
| Learning rate                    | 0.6                  |
| Number of features               | 256                  |
| Momentum encoder ema coefficient | 0.99                 |
| MLP hidden dimensions            | 4096                 |
| Softmax temperature              | 1.0                  |
| Optimizer                        | LARS                 |
| Weight decay                     | $1.0 \times 10^{-6}$ |

Table 4: MoCo v3 hyperparameters

| Hyperparameter         | Value                |
|------------------------|----------------------|
| Base Learning Rate     | 0.2                  |
| Covariance coefficient | 1.0                  |
| MLP dimensions         | 1024-1024-1024       |
| Invariance coefficient | 25.0                 |
| Variance coefficient   | 25.0                 |
| Weight decay           | $1.0 \times 10^{-6}$ |

Table 5: VICReg hyperparameters

| Hyperparameter         | Value                |
|------------------------|----------------------|
| Base Learning Rate     | 0.2                  |
| Covariance coefficient | 10.0                 |
| MLP dimensions         | 1024-1024-1024       |
| Invariance coefficient | 25.0                 |
| Variance coefficient   | 25.0                 |
| Weight decay           | $1.0 \times 10^{-6}$ |

Table 6: TOV-VICReg hyperparameters

## G MODELS USED

| Model Name       | # parameters |
|------------------|--------------|
| Nature CNN       | 75.936       |
| SGI ResNet Large | 4.932.524    |
| ViT tiny         | 5.526.720    |

Table 7: Number of learnable parameters of each model we used

| Games      | Nature CNN                           | SGL ResNet-L      | ViT                                | ViT+TOV-VICReg                      | ViT+DINO          | ViT+MoCo                            | ViT+VICReg                          |
|------------|--------------------------------------|-------------------|------------------------------------|-------------------------------------|-------------------|-------------------------------------|-------------------------------------|
| Assault    | 355.1 $\pm$ 105.2                    | 452.0 $\pm$ 349.1 | 322.7 $\pm$ 146.9                  | 366.3 $\pm$ 124.5                   | 493.3 $\pm$ 254.7 | 493.3 $\pm$ 181.1                   | <b>408.5 <math>\pm</math> 156.6</b> |
| Alien      | 210.8 $\pm$ 133.1                    | 186.9 $\pm$ 104.4 | 250.6 $\pm$ 142.6                  | 197.6 $\pm$ 114.4                   | 275.1 $\pm$ 153.2 | <b>380.8 <math>\pm</math> 194.7</b> | 187.3 $\pm$ 118.8                   |
| Bank Heist | 37.6 $\pm$ 29.5                      | 30.6 $\pm$ 18.6   | <b>58.3 <math>\pm</math> 115.4</b> | 34.5 $\pm$ 18.8                     | 18.6 $\pm$ 10.7   | 21.0 $\pm$ 30.1                     | 29.6 $\pm$ 13.6                     |
| Breakout   | <b>5.1 <math>\pm</math> 3.3</b>      | 4.7 $\pm$ 2.1     | 3.2 $\pm$ 2.6                      | 4.3 $\pm$ 2.7                       | 2.8 $\pm$ 2.1     | 2.7 $\pm$ 1.6                       | 3.1 $\pm$ 1.6                       |
| Chopper    | 828.0 $\pm$ 323.8                    | 737.0 $\pm$ 354.0 | 747.0 $\pm$ 268.5                  | <b>853.0 <math>\pm</math> 312.2</b> | 760.0 $\pm$ 249.0 | 968.0 $\pm$ 673.0                   | 668.0 $\pm$ 274.9                   |
| Command    |                                      |                   |                                    |                                     |                   |                                     |                                     |
| Freeway    | <b>30.4 <math>\pm</math> 1.2</b>     | 26.5 $\pm$ 2.5    | 21.2 $\pm$ 1.4                     | 25.9 $\pm$ 2.7                      | 25.0 $\pm$ 2.0    | 22.5 $\pm$ 2.1                      | 23.7 $\pm$ 2.4                      |
| Frostbite  | 120.1 $\pm$ 25.9                     | 107.9 $\pm$ 26.8  | 127.5 $\pm$ 15.6                   | <b>143.7 <math>\pm</math> 106.7</b> | 132.7 $\pm$ 14.1  | 111.3 $\pm$ 37.0                    | 120.0 $\pm$ 18.2                    |
| Kangaroo   | <b>776.0 <math>\pm</math> 1035.4</b> | 405.0 $\pm$ 226.4 | 60.0 $\pm$ 91.7                    | 704.0 $\pm$ 1076.7                  | 316.0 $\pm$ 233.5 | 384.0 $\pm$ 531.0                   | 268.0 $\pm$ 244.5                   |
| MsPacman   | <b>781.3 <math>\pm</math> 417.1</b>  | 757.7 $\pm$ 413.2 | 618.9 $\pm$ 259.9                  | 639.5 $\pm$ 378.4                   | 698.9 $\pm$ 374.5 | 586.4 $\pm$ 257.5                   | 633.0 $\pm$ 372.1                   |
| Pong       | -13.6 $\pm$ 9.7                      | -12.0 $\pm$ 8.6   | -21.0 $\pm$ 0.0                    | <b>-6.2 <math>\pm</math> 13.4</b>   | -18.4 $\pm$ 3.4   | -17.6 $\pm$ 4.3                     | -15.1 $\pm$ 3.9                     |

Table 8: Table of results (mean and standard error) from experiments presented in Section 6. The bold values represent the best scores for the corresponding game

## H RESULTS TABLE

---

## I DATA-EFFICIENCY IN UNSEEN ENVIRONMENTS

Table 9 shows a comparison of the non-pretrained and pre-trained (using TOV-VICReg) Vision Transformer in Atari games that were not used in the pre-training phase.

| Games         | ViT tiny            | TOV-VICReg+ViT     |
|---------------|---------------------|--------------------|
| Asterix       | $443.5 \pm 225.6$   | $445.0 \pm 214.9$  |
| Krull         | $944.5 \pm 525.8$   | $708.9 \pm 572.3$  |
| RoadRunner    | $2687.0 \pm 2884.3$ | $913.0 \pm 1289.9$ |
| SpaceInvaders | $184.3 \pm 117.0$   | $155.9 \pm 91.0$   |
| Venture       | $4.0 \pm 28.0$      | $76.0 \pm 152.4$   |

Table 9: Mean and standard error results of the evaluations across 10 different training runs, where at each evaluation the agent plays 10 episodes of the game. The agent was trained using the Rainbow algorithm for 100k steps.
